# Supplementary material for: Dampened antiviral immunity to intravaginal exposure to RNA viral pathogens allows enhanced viral replication
Source: PubMed Central journal article supplement — J Exp Med. 2016 Dec 12;213(13):2913–29. doi: 10.1084/jem.20161289 (PMC5154948; doi:10.1084/jem.20161289), 2016-12-12
Supplement: JEM_20161289_sm.pdf [file JEM_20161289_sm.pdf]

SUPPLEMENTAL MATERIAL

Khan et al., <https://doi.org/10.1084/jem.20161289>

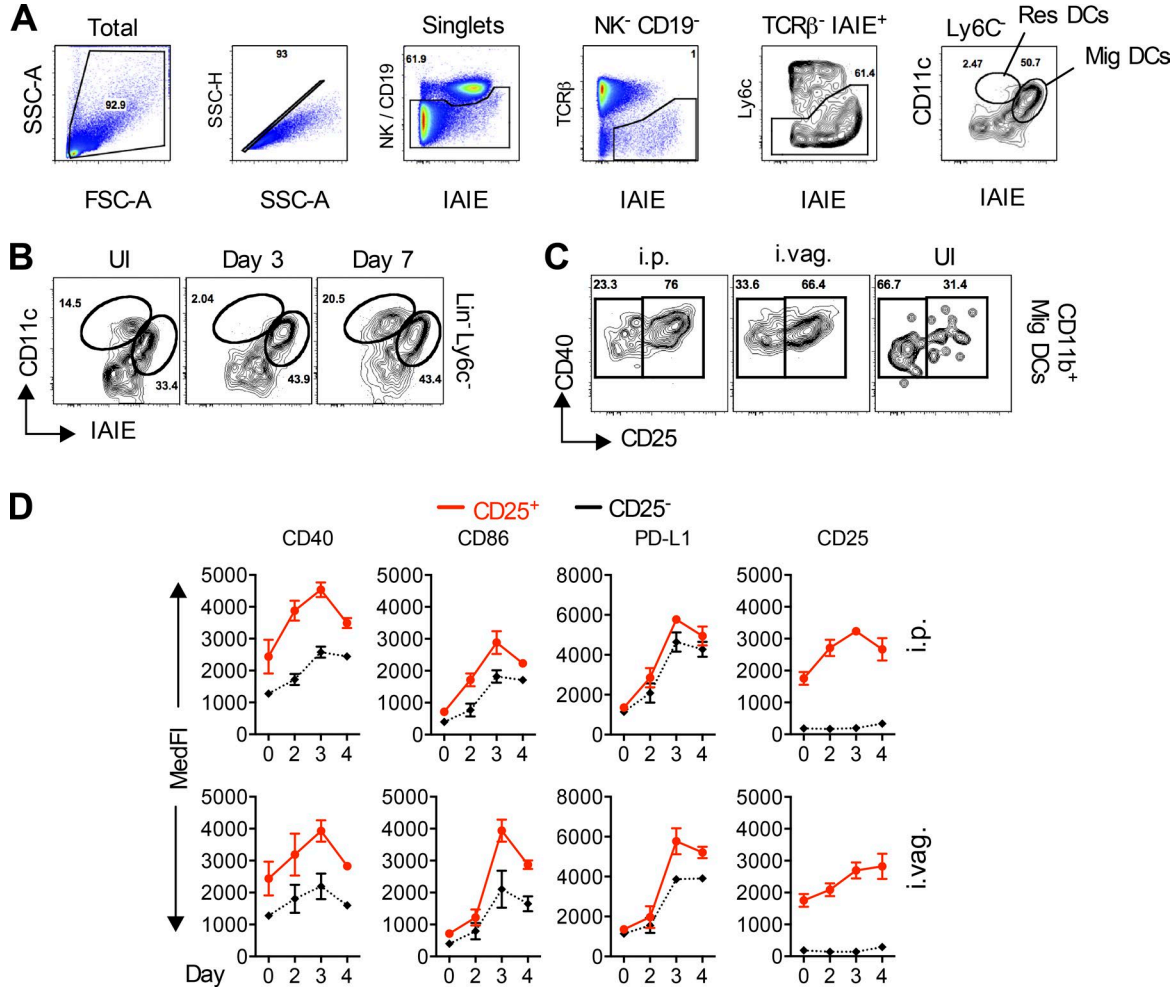

Figure S1. **Gating strategy and maturation of Mig DCs in the iLN of LCMV-infected animals.** (A) Gating strategy for analyzing DCs by flow cytometry at day 3 after i.vag. LCMV infection. (B) Abundance of Mig and resident DCs in the iLN at the indicated time points after i.vag. infection. (C) Gating on CD11b<sup>+</sup> Mig DCs in iLN at day 3 after infection for determining CD25<sup>+</sup> and CD25<sup>-</sup> populations. (D) Expression of various activation markers on CD25<sup>+</sup> and CD25<sup>-</sup> populations among CD11b<sup>+</sup> Mig DCs after i.vag. infection. *n* = 3 mice per group from one of three independent experiments. Data are represented as mean ± SEM. FSC, forward scatter; IAIE, MHC-II including both I-A and I-E; MedFl, median fluorescence intensity; Res, resident; SSC, side scatter; UI, uninfected.

Table S1. Primer sequences for qRT-PCR analyses

| Gene           | Forward (SYBR; 5'-3')      | Reverse (SYBR; 5'-3')     | Accession no. |
|----------------|----------------------------|---------------------------|---------------|
| LCMV           | CATTCACCTGGACTTTGTCAGACTC  | GCAACTGCTGTGTTCCCGAAAC    |               |
| ZIKV           | GAGACGAGATGCGGTACAGG       | CGACCGTCAGTTGAACTCCA      |               |
| IFN- $\beta$   | CCACCACAGCCCTCTCCATCAACTAT | CAAGTGGAGAGCAGTTGAGGACATC | NM_010510.1   |
| IFN- $\lambda$ | AGCTGCAGGTCCAAGAGCG        | GGTGGTCAGGGCTGAGTCATT     | NM_177396.1   |
| IFN- $\alpha$  | TCCTGGCGGTGATGAGCTA        | AGTCTGAGGCAGGTCACATCCT    | NM_010502.2   |
| MDA5           | GGCACCATGGGAAGTGATT        | ATTTGGTAAGGCCTGAGCTG      | NM_027835.3   |
| RIG-I          | TTGCTGAGTGCAATCTCGTC       | GTATGCCGTGAACCGTCTTT      | NM_172689.3   |
| IRF7           | CAGCAGCAGTCTCGGCTTGTG      | TGACCCAGGTCCATGAGGAAGTG   | NM_016850.3   |
| CXCL9          | TCCTTTTGGGCATCATCTTCC      | TTTGTAGTGGATCGTGCCTCG     | CT010194.1    |
| CXCL10         | GTCTTAATTGCCCTTGGT         | TCTTGCTTCGGCAGTTAC        | NM_021274.2   |
| IFN- $\gamma$  | GAGCCAGATTATCTTTTCTACC     | GTTGTTGACCTCAAACCTTGG     | NM_008337.4   |
| IL-6           | GAGGATACCACTCCCAACAGACC    | AAGTGCATCATCGTTGTTCATACA  | NM_031168.2   |
| TNF            | CATCTTCTCAAAATTCGAGTGACAA  | TGGGAGTAGACAAGGTACAACCC   | NM_013693.3   |
| GAPDH          | TGTGTCCTCGTGGATCTGA        | CCTGCTTACCACCTTCTTGA      | NM_008084.3   |
